# Supplementary material for: Surface structures of poly(methyl methacrylate) films influenced by chain entanglement in the corresponding film-formation solution
Source: Royal Society of Chemistry journal article supplement (doi:10.1039/c4sm01743a), 2014-01-01
Supplement: c4sm01743a1.pdf [file c4sm01743a1.pdf]

## Supplementary Information for:

### Surface Structure of Poly(methyl methacrylate) Films Influenced by Chain Entanglement in the Corresponding Film-Formation Solution

*Jianquan Xu, Yinjun Liu, Jinsheng He, RongPing Zhang, Biao Zuo, Xinping Wang\**

Department of Chemistry, Key Laboratory of Advanced Textile Materials and Manufacturing  
Technology of Education Ministry, Zhejiang Sci-Tech University, Hangzhou 310018, China

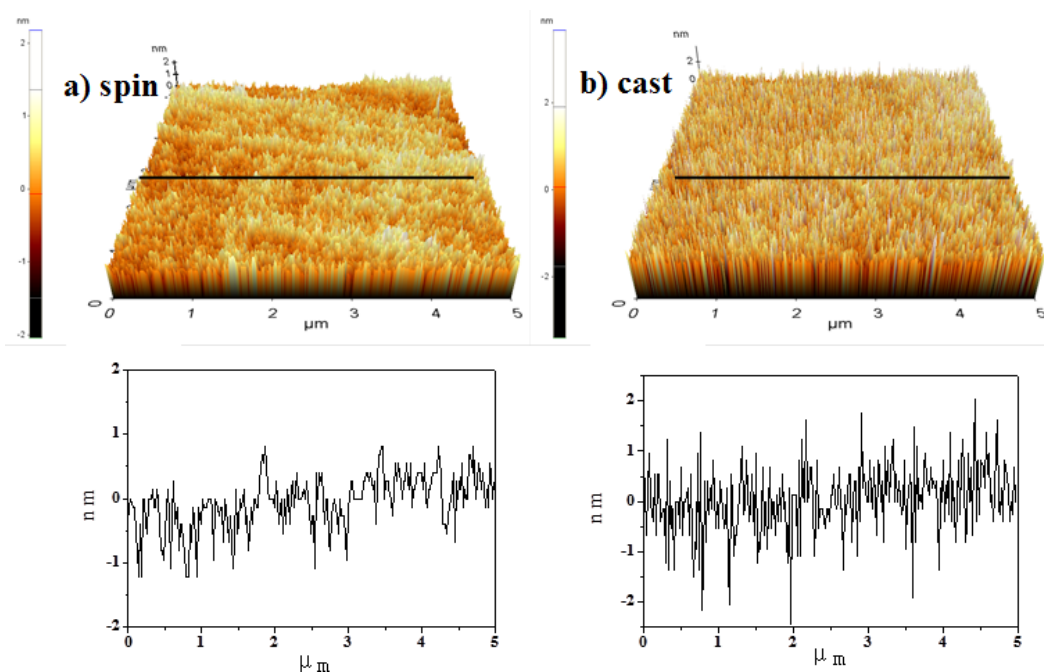

**Fig. S1** AFM topography images of spin-coated (a) and cast (b) M1027 films. The solution concentration was 2.0wt% and the spin-coating speed was at 3000 rpm.

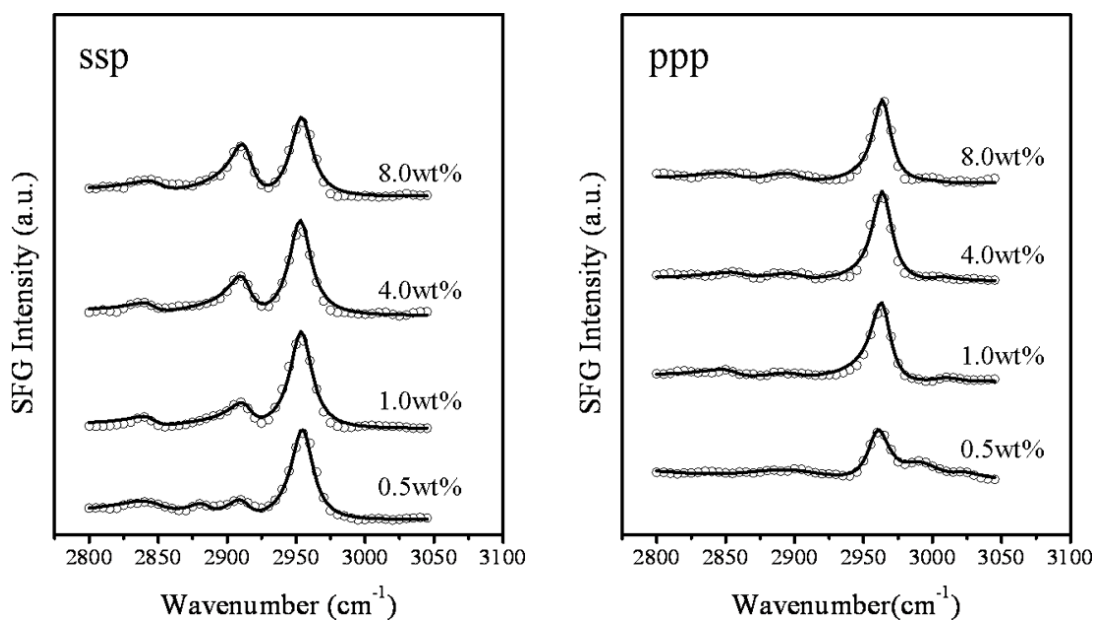

**Fig.S2** SFG spectra of cast M540 films prepared by various concentrations of casting solution.

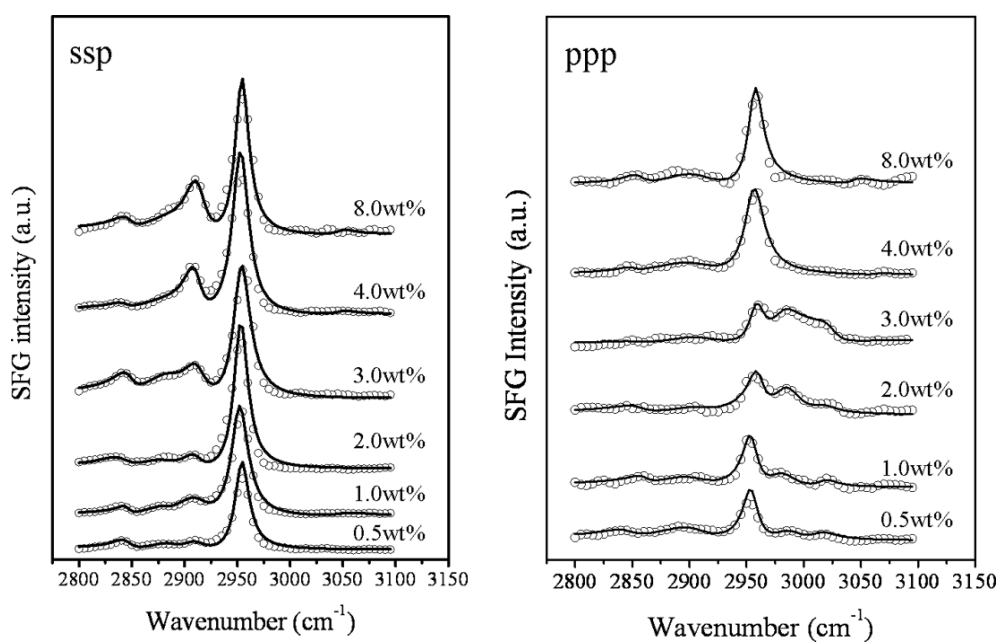

**Fig. S3** SFG spectra of the M1027 films spin-coated at 3000 rpm with various solution concentrations of casting solution.

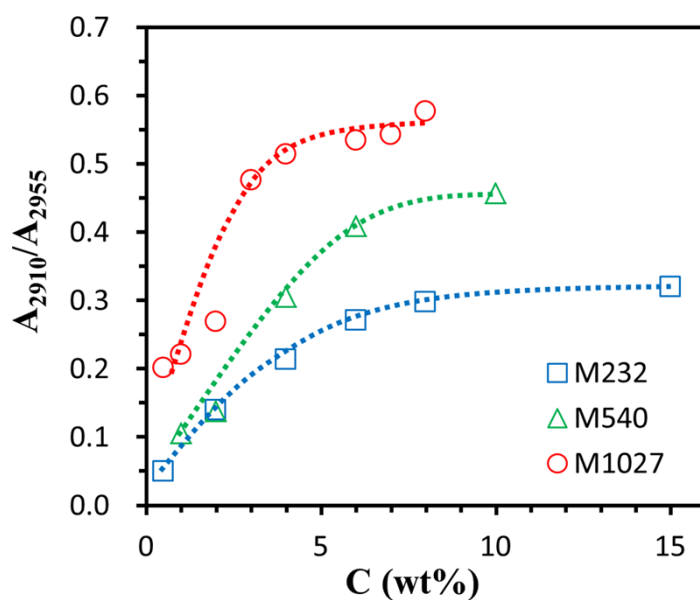

**Fig. S4** Concentration dependence of  $A_{2910}/A_{2955}$  from SFG spectra of PMMA films with various molecular weights spin-coated at 1500 rpm. The dash line is a guide to the eye.

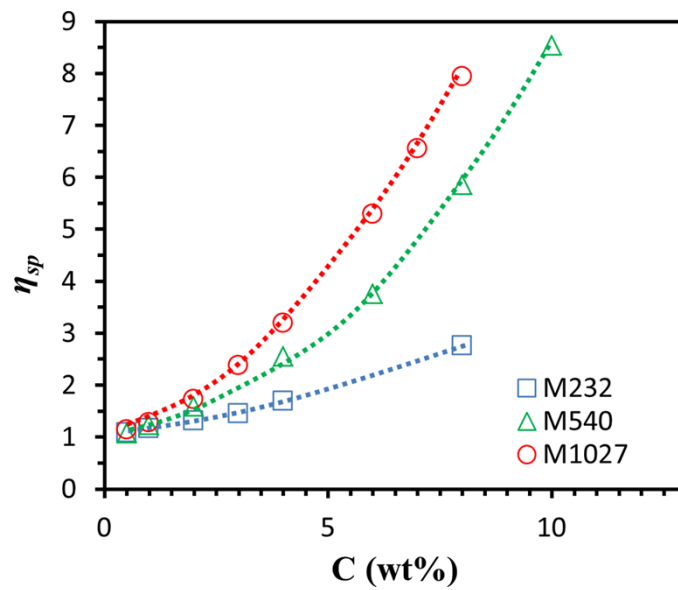

**Fig. S5** Relationship between the specific viscosity and solution concentration of casting solution.
